# Supplementary material
Source: PubMed Central journal article supplement (PMC3058238)

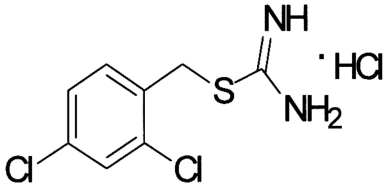

**RRD-251**

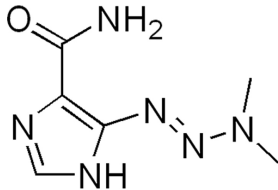

**Dacarbazine**

**Supplementary Figure 1. Structures of RRD251 and Dacarbazine**

Supplement: NIHMS248518-supplement-1.pdf [file NIHMS248518-supplement-1.pdf]
